# Supplementary material for: One-step synthesis of Ni3S2nanoplatelets on graphene for high performance supercapacitors
Source: Royal Society of Chemistry journal article supplement (doi:10.1039/c5ra22426h), 2016-01-01
Supplement: c5ra22426h1.pdf [file c5ra22426h1.pdf]

## Supporting Information

# One-step Synthesis of Ni<sub>3</sub>S<sub>2</sub> Nanoplatelets on Graphene for High Performance Supercapacitors

Xuewu OU, Zhengtang LUO\*

*Department of Chemical and Biomolecular Engineering, Hong Kong University of Science and Technology, Clear Water Bay, Kowloon, Hong Kong*

E-mail: [keztluo@ust.hk](mailto:keztluo@ust.hk)

From the CV curve, the specific capacitance is calculated from the following equation:

$$C = \frac{1}{v(V_2 - V_1)} \int_{V_1}^{V_2} I(V) dV,$$

where  $v$  is the scanning rate,  $V_2 - V_1$  is the scanning range and  $I(V)$  is the current density (A/g) corresponding to the voltage. From charge/discharge curve, the capacitance was calculated from:

$$C = \frac{dQ}{dU} = \frac{I dt}{dU} = \frac{I}{dU/dt},$$

where  $I$  is the current density for the charge/discharge test,  $dU/dt$  is the slope of the discharge curve.

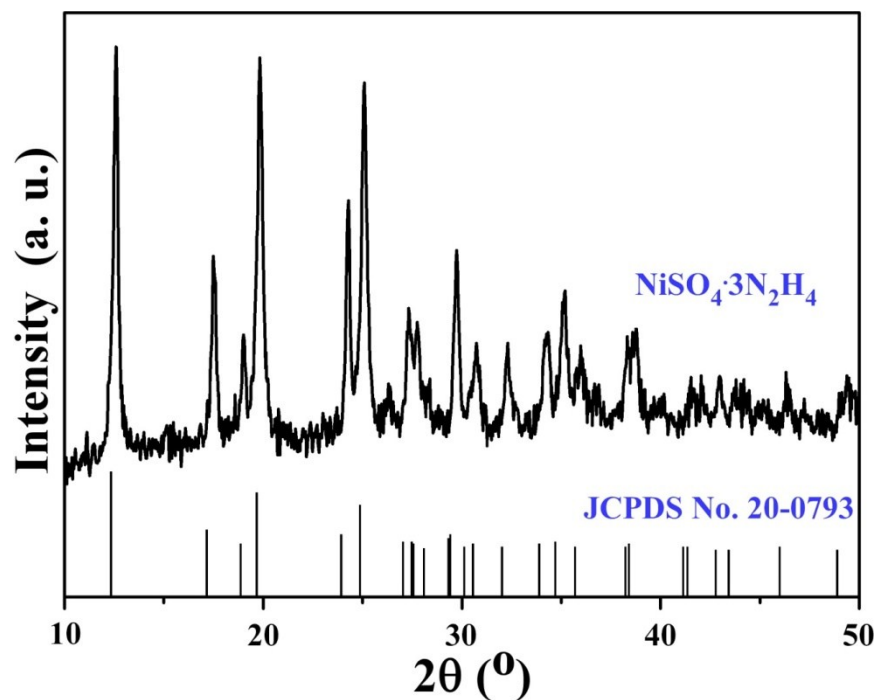

Fig. S1 XRD spectrum of NiSO<sub>4</sub>·3N<sub>2</sub>H<sub>4</sub>. Below is the standard JCPDS card of NiSO<sub>4</sub>·3N<sub>2</sub>H<sub>4</sub>.

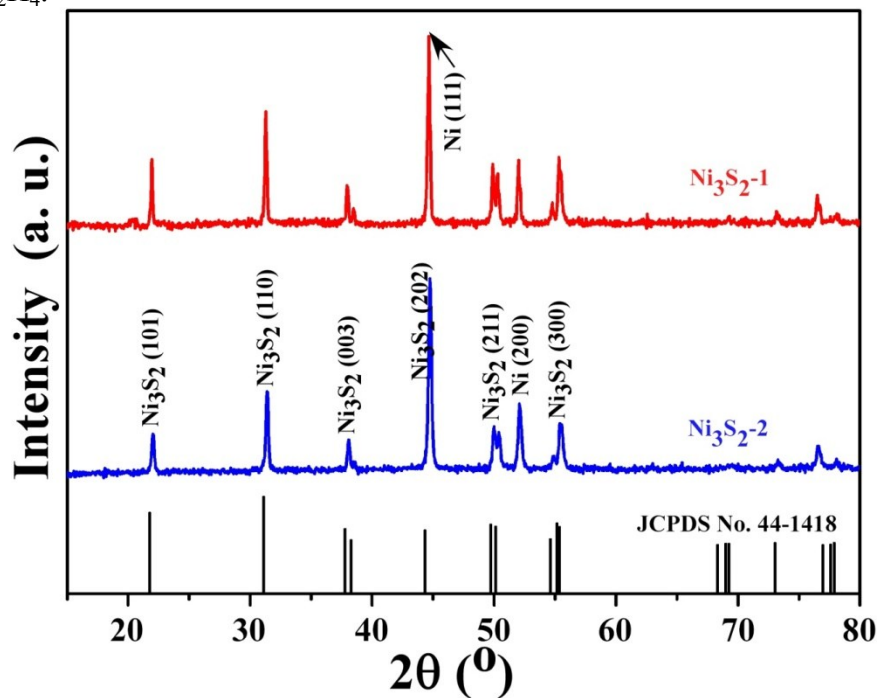

Fig. S2 XRD spectrum of Ni<sub>3</sub>S<sub>2</sub> reduced from NiSO<sub>4</sub>·7H<sub>2</sub>O (Ni<sub>3</sub>S<sub>2</sub>-1) and NiSO<sub>4</sub>·3N<sub>2</sub>H<sub>4</sub> (Ni<sub>3</sub>S<sub>2</sub>-2), respectively. Below is the standard JCPDS card of Ni<sub>3</sub>S<sub>2</sub>.

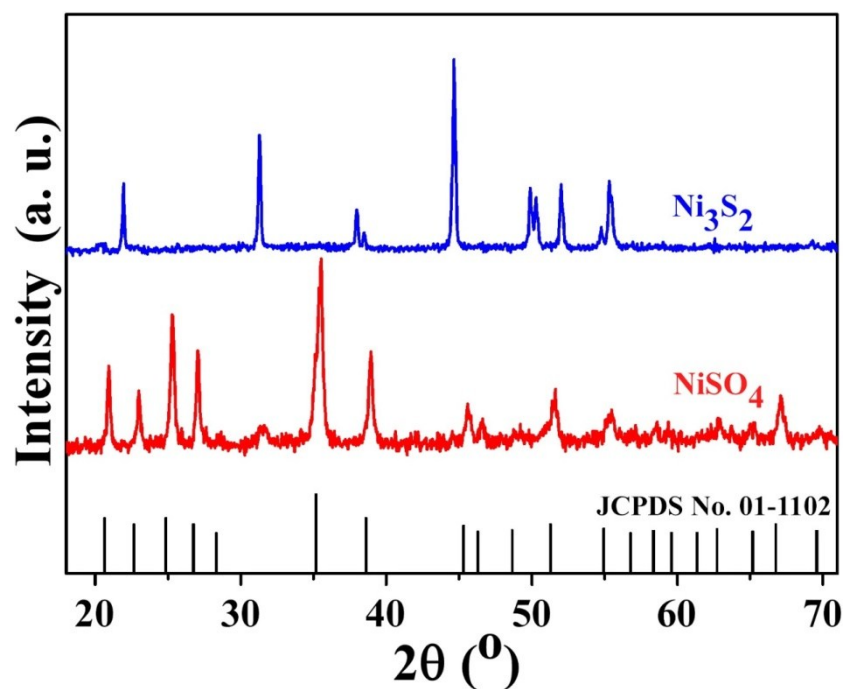

Fig. S3 XRD spectrum comparison of  $\text{NiSO}_4 \cdot 7\text{H}_2\text{O}$  with/without  $\text{H}_2$  reduction. Below is the standard JCPDS card of  $\text{NiSO}_4$ .

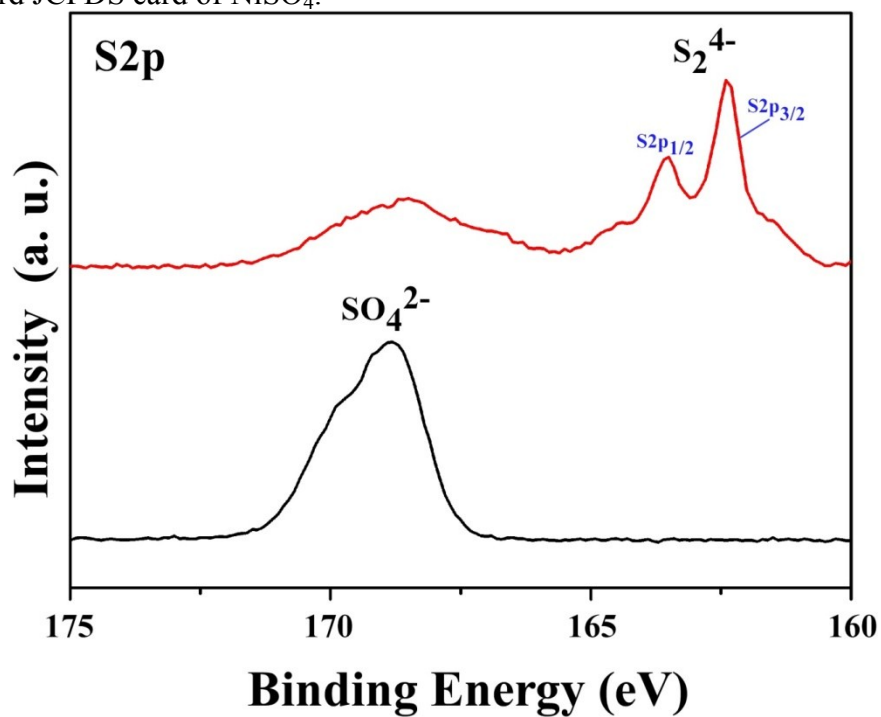

Fig. S4 High resolution S2p spectrum of  $\text{NiSO}_4$  before and after  $\text{H}_2$  reduction.

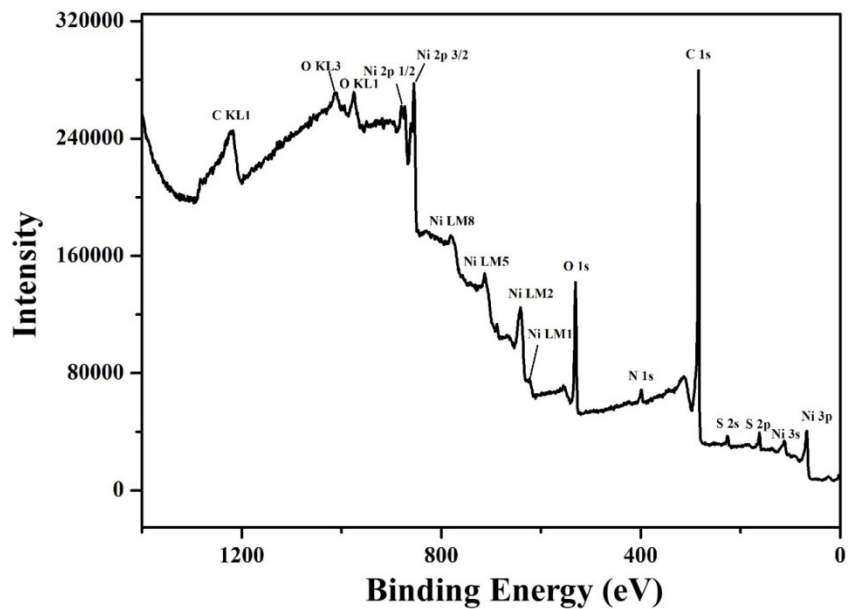

Fig. S5 XPS spectrum of  $\text{Ni}_3\text{S}_2/\text{rGO-2}$ .

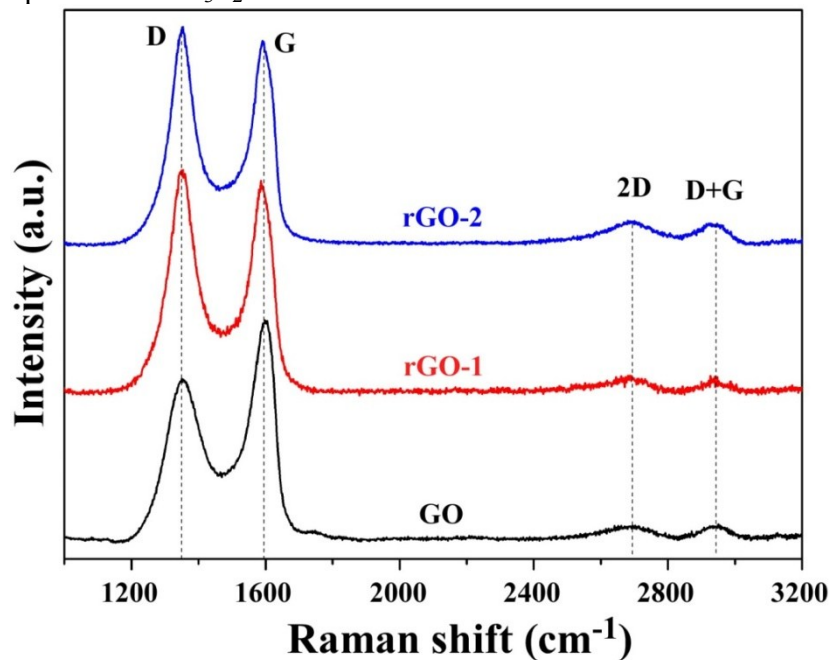

Fig. S6 Raman spectra of GO in comparison with reduced graphene oxide (rGO) in  $\text{Ni}_3\text{S}_2/\text{rGO-1}$  and  $\text{Ni}_3\text{S}_2/\text{rGO-2}$ .

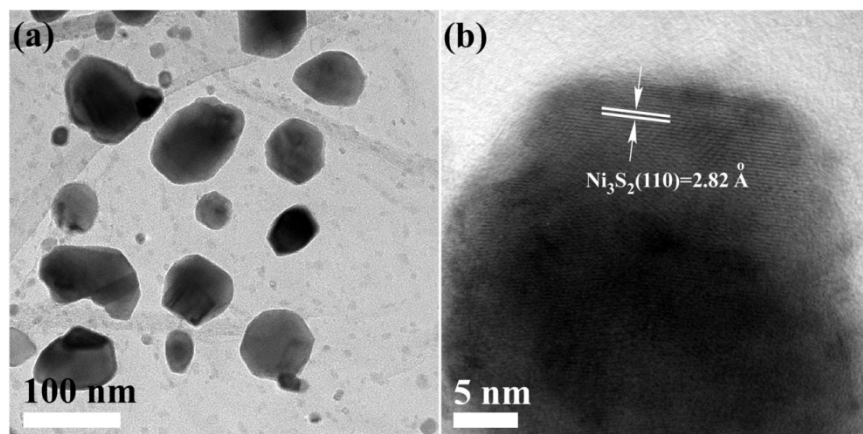

Fig. S7 TEM results of  $\text{Ni}_3\text{S}_2/\text{rGO}$  reduced from  $\text{NiSO}_4/\text{GO}$ . (1) Round and irregular shape  $\text{Ni}_3\text{S}_2$  nanoparticles with non-uniform size on graphene surface. (2) High resolution TEM of the  $\text{Ni}_3\text{S}_2$  nanoparticles.

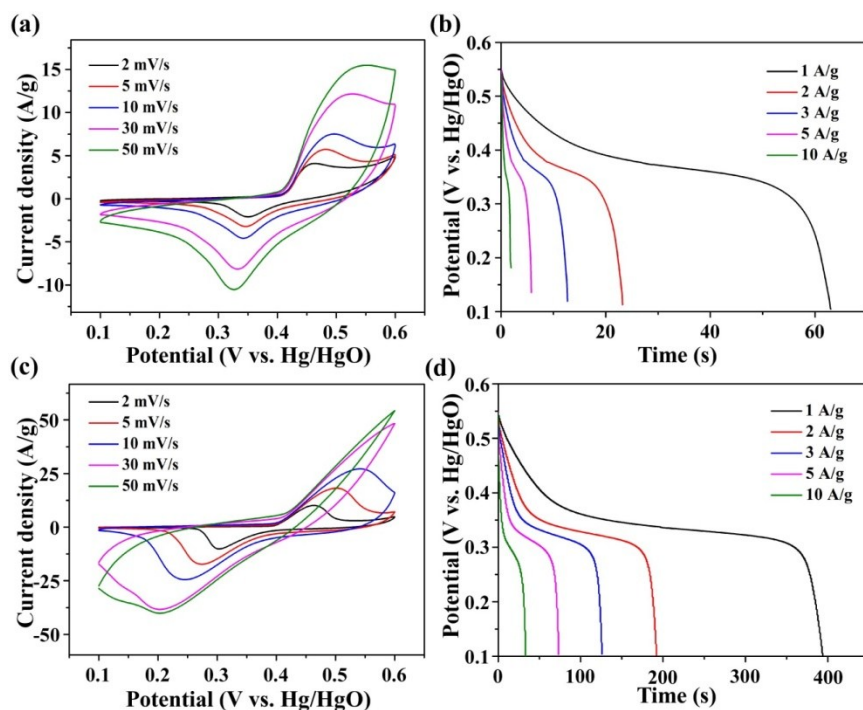

Fig. S8 Electrochemical test of electrodes made from  $\text{Ni}_3\text{S}_2/\text{rGO}$ -1 and  $\text{Ni}_3\text{S}_2/\text{rGO}$ -2. (a) Cyclic voltammetry (CV) curves for  $\text{Ni}_3\text{S}_2/\text{rGO}$ -1 at the scanning rate at the range of 2~50  $\text{mV s}^{-1}$ . (b) Corresponding discharge results at current density from 1  $\text{A g}^{-1}$  to 10  $\text{A g}^{-1}$  for  $\text{Ni}_3\text{S}_2/\text{rGO}$ -1. (c) CV curve for  $\text{Ni}_3\text{S}_2/\text{rGO}$ -2. (d) Corresponding discharge result for  $\text{Ni}_3\text{S}_2/\text{rGO}$ -2.

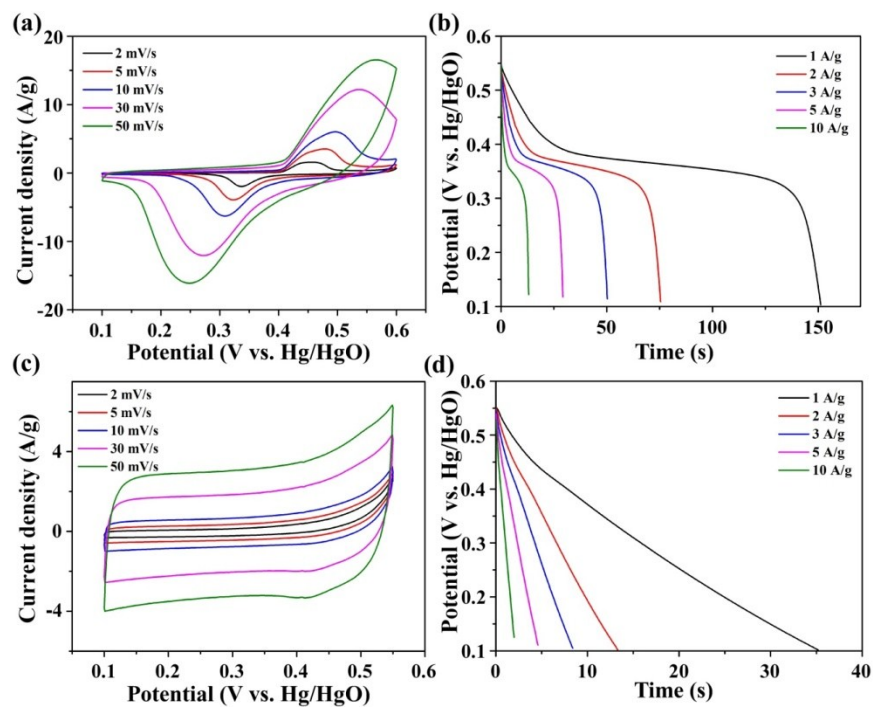

Fig. S9 Electrochemical test of electrodes made from pure  $\text{Ni}_3\text{S}_2$ -2 reduced from  $\text{NiSO}_4 \cdot 3\text{N}_2\text{H}_4$  and pure reduced graphene oxide (rGO). (a) Cyclic voltammetry (CV) curves for  $\text{Ni}_3\text{S}_2$ -2 at the scanning rate at the range of 2~50  $\text{mV s}^{-1}$ . (b) Corresponding discharge results at current density from 1  $\text{A g}^{-1}$  to 10  $\text{A g}^{-1}$  for  $\text{Ni}_3\text{S}_2/\text{rGO}$ -1. (c) CV curve for rGO. (d) Corresponding discharge result for rGO.

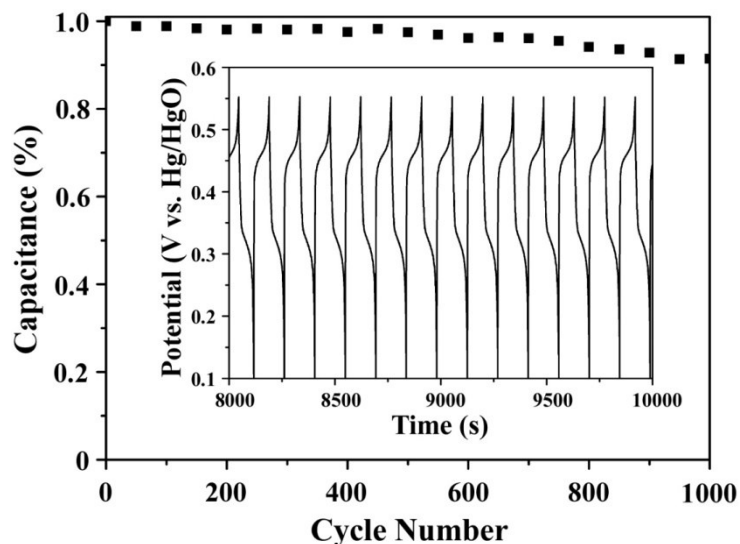

Fig. S10 Cycling stability of  $\text{Ni}_3\text{S}_2/\text{rGO}$ -2 at current density of 5  $\text{A g}^{-1}$ . Inset is a part of the charge/discharge results.
